# Supplementary figures and images for: Genome-Wide Identification and Expression Profiles of C-Repeat Binding Factor Transcription Factors in Betula platyphylla under Abiotic Stress
Source: MDPI journal article supplement (doi:10.3390/ijms241310573), 2023-06-24

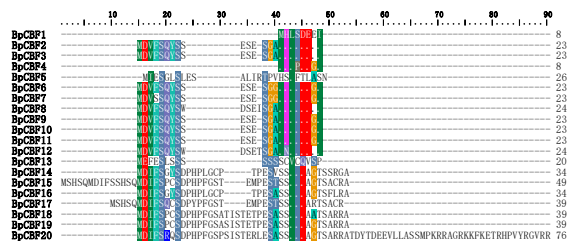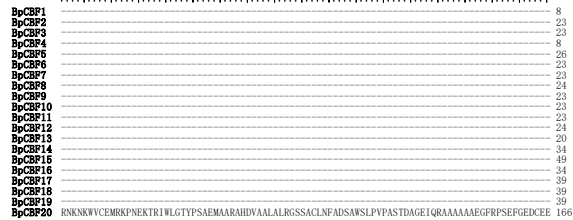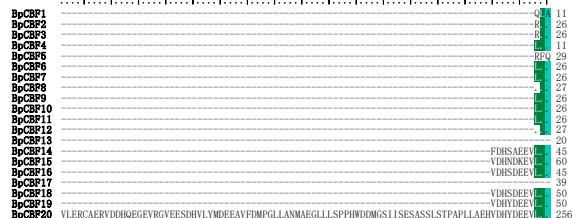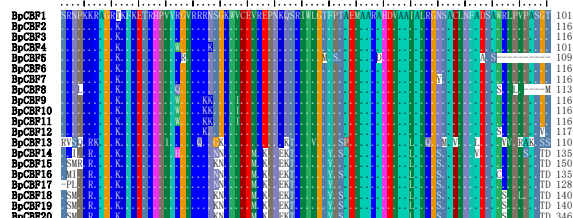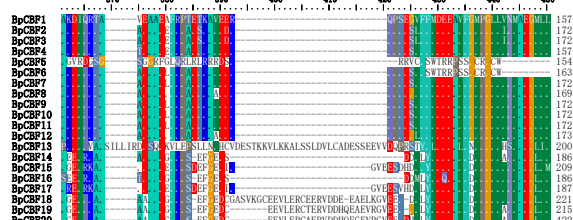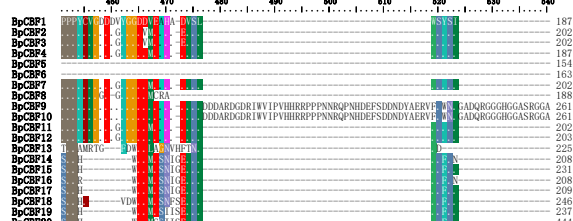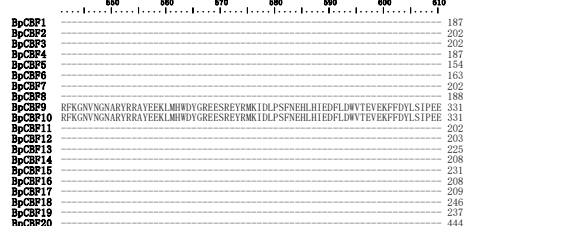

Supplement: s1 [file s1]
